# Supplementary material
Source: PubMed Central journal article supplement (PMC4787706)
Supplement: akes710293.ww1_default.pdf [file akes710293.ww1_default.pdf]

**Appendix 1** Summary of search strategies used to retrieve the relevant studies [posted as supplied by author]

| <b>Search element</b>          | <b>MEDLINE</b>                                                                                                                                                                                                                                                                                                                                                                                                  | <b>EMBASE</b>                                                                                                                                                                                                                                                                                                                                                                                                   | <b>Cochrane Library</b>                                                                                                                                                                                                                                                                                     |
|--------------------------------|-----------------------------------------------------------------------------------------------------------------------------------------------------------------------------------------------------------------------------------------------------------------------------------------------------------------------------------------------------------------------------------------------------------------|-----------------------------------------------------------------------------------------------------------------------------------------------------------------------------------------------------------------------------------------------------------------------------------------------------------------------------------------------------------------------------------------------------------------|-------------------------------------------------------------------------------------------------------------------------------------------------------------------------------------------------------------------------------------------------------------------------------------------------------------|
| Exposure                       | Thesaurus term exploded<br>Shock<br>Shock, septic<br>Hypovolemia<br>Multi Organ failure<br>Hypotension<br>+Subheading<br>Therapy<br>Prevention & Control                                                                                                                                                                                                                                                        | Thesaurus term exploded<br>Shock<br>Shock, septic<br>Hypovolemia<br>Multi Organ failure<br>Hypotension<br>+Subheading<br>Therapy<br>Prevention & Control                                                                                                                                                                                                                                                        | Mesh term exploded all trees<br>Shock, septic<br>Hypovolemia<br>Hypotension<br><br>Key word: Shock                                                                                                                                                                                                          |
| Intervention                   | Thesaurus term exploded<br>Colloids<br>Fluid Therapy<br>Dextrans<br>Polygeline<br>Hetastarch<br>Plasma Substitutes<br>+Subheading<br>Administration & Dosage,<br>Therapeutic Use,<br>Toxicity<br>Therapy<br>Adverse effects                                                                                                                                                                                     | Thesaurus term exploded<br>Colloids<br>Fluid Therapy<br>Dextrans<br>Polygeline<br>Hetastarch<br>Plasma Substitutes<br>+Subheading<br>Administration & Dosage,<br>Therapeutic Use,<br>Toxicity<br>Therapy<br>Adverse effects                                                                                                                                                                                     | Mesh term exploded all trees<br>Colloids<br>Fluid Therapy<br>Dextrans<br>Polygeline<br>Hetastarch<br>Plasma Substitutes                                                                                                                                                                                     |
| Keywords<br>(for intervention) | Albumin*, ppf, gelatin*, colloid*,gentran*,<br>haemaccel, hemaccel, pentastarch<br>pentaspan, gelofusine, Gelafundin, crystalloid*,<br>ringer*, hartman*, sodium*, fluid therap*,<br>plasma substit*, volume replace*, plasma<br>replace*, fluid replace*, fluid restor*, fluid<br>resusc*, fluid expansion<br>Searched in: mp=title, original title, abstract,<br>name of substance word, subject heading word | Albumin*, ppf, gelatin*, colloid*,gentran*,<br>haemaccel, hemaccel, pentastarch<br>pentaspan, gelofusine, Gelafundin, crystalloid*,<br>ringer*, hartman*, sodium*, fluid therap*, plasma<br>substit*, volume replace*, plasma replace*, fluid<br>replace*, fluid restor*, fluid resusc*, fluid<br>expansion<br>Searched in: mp=title, original title, abstract,<br>name of substance word, subject heading word | Albumin*, ppf, gelatin*, colloid*,gentran*,<br>haemaccel, hemaccel, pentastarch<br>pentaspan, gelofusine, Gelafundin,<br>crystalloid*, ringer*, hartman*, sodium*,<br>fluid therap*, plasma substit*, volume<br>replace*, plasma replace*, fluid replace*,<br>fluid restor*, fluid resusc*, fluid expansion |
| Population                     | Humans<br>Infant (1 to 23 months)<br>Preschool child (2 to 5 years)                                                                                                                                                                                                                                                                                                                                             | Human<br>Infant (up to one year)<br>Child                                                                                                                                                                                                                                                                                                                                                                       | No limits                                                                                                                                                                                                                                                                                                   |

|                      | Child (6 to 12 years)                                                                                                                                                                                                                                                                                                                                                                                                                                                                                                                                                                       | Preschool child (1 to 6 years)<br>School child (7 to 12 years)                                                                                                                                                                                                                                                                                                                                                                                                                                                                                                                              |                                                                                                                                                                                                                                                                                                                                                                                                                                                                                                                                                                                             |
|----------------------|---------------------------------------------------------------------------------------------------------------------------------------------------------------------------------------------------------------------------------------------------------------------------------------------------------------------------------------------------------------------------------------------------------------------------------------------------------------------------------------------------------------------------------------------------------------------------------------------|---------------------------------------------------------------------------------------------------------------------------------------------------------------------------------------------------------------------------------------------------------------------------------------------------------------------------------------------------------------------------------------------------------------------------------------------------------------------------------------------------------------------------------------------------------------------------------------------|---------------------------------------------------------------------------------------------------------------------------------------------------------------------------------------------------------------------------------------------------------------------------------------------------------------------------------------------------------------------------------------------------------------------------------------------------------------------------------------------------------------------------------------------------------------------------------------------|
| Publication language | No restrictions                                                                                                                                                                                                                                                                                                                                                                                                                                                                                                                                                                             | No restrictions                                                                                                                                                                                                                                                                                                                                                                                                                                                                                                                                                                             | No restrictions                                                                                                                                                                                                                                                                                                                                                                                                                                                                                                                                                                             |
| Study design         | <p>controlled.mp<br/> controlled clinical trial*.mp<br/> clinical.mp, trial*,<br/> randomi* controlled trial*.mp,<br/> double.mp,<br/> blind.mp<br/> double blind.mp<br/> placebo*.mp<br/> random*.mp<br/> single.mp<br/> single blind.mp<br/> triple.mp<br/> triple blind.mp<br/> mask*.mp<br/> controlled trial*.mp<br/> meta analysis.mp or Meta-Analysis/<br/> clinical trial*.mp<br/> metanalysis.mp<br/> exp Research Design/<br/> prospective*.mp,<br/> Prospective Studies/<br/> Evaluation Studies/<br/> Cross-Over Studies/<br/> Follow-up Studies/<br/> Comparative Studies/</p> | <p>controlled.mp<br/> controlled clinical trial*.mp<br/> clinical.mp, trial*,<br/> randomi* controlled trial*.mp,<br/> double.mp,<br/> blind.mp<br/> double blind.mp<br/> placebo*.mp<br/> random*.mp<br/> single.mp<br/> single blind.mp<br/> triple.mp<br/> triple blind.mp<br/> mask*.mp<br/> controlled trial*.mp<br/> meta analysis.mp or Meta-Analysis/<br/> clinical trial*.mp<br/> metanalysis.mp<br/> exp Research Design/<br/> prospective*.mp,<br/> Prospective Studies/<br/> Evaluation Studies/<br/> Cross-Over Studies/<br/> Follow-up Studies/<br/> Comparative Studies/</p> | <p>controlled.mp<br/> controlled clinical trial*.mp<br/> clinical.mp, trial*,<br/> randomi* controlled trial*.mp,<br/> double.mp,<br/> blind.mp<br/> double blind.mp<br/> placebo*.mp<br/> random*.mp<br/> single.mp<br/> single blind.mp<br/> triple.mp<br/> triple blind.mp<br/> mask*.mp<br/> controlled trial*.mp<br/> meta analysis.mp or Meta-Analysis/<br/> clinical trial*.mp<br/> metanalysis.mp<br/> exp Research Design/<br/> prospective*.mp,<br/> Prospective Studies/<br/> Evaluation Studies/<br/> Cross-Over Studies/<br/> Follow-up Studies/<br/> Comparative Studies/</p> |
| Limits               | <p>Studies with the following keywords in the title excluded;<br/> diarrh*,gastr*,burn*,surg*oral*,traum*<br/> ORS*, cholera*, shigel*, women, caesarean,<br/> maternal, enter*, injur*, dysent*</p>                                                                                                                                                                                                                                                                                                                                                                                        | <p>Studies with the following keywords in the title excluded;<br/> diarrh*,gastr*,burn*,surg*oral*,traum*<br/> ORS*, cholera*, shigel*, women, caesarean,<br/> maternal, enter*, injur*, dysent*</p>                                                                                                                                                                                                                                                                                                                                                                                        | <p>Studies with the following keywords in the title excluded;<br/> diarrh*,gastr*,burn*,surg*oral*,traum*<br/> ORS*, cholera*, shigel*, women, caesarean,<br/> maternal, enter*, injur*, dysent*</p>                                                                                                                                                                                                                                                                                                                                                                                        |
