# Supplementary material
Source: PubMed Central journal article supplement (PMC4787706)
Supplement: akes710293.ww2_default.pdf [file akes710293.ww2_default.pdf]

**Appendix 2** Characteristics of excluded studies [posted as supplied by author]

---

| <b>Study</b>   | <b>Reason for exclusion</b>                       |
|----------------|---------------------------------------------------|
| Alpar 2004     | Trauma                                            |
| Beards 1994    | Adults                                            |
| Finfer 2004    | Adults                                            |
| Haibach 1976   | Not retrieved                                     |
| Ochocka 1984   | Article in Polish, not retrieved                  |
| Pockaj 1994    | Conducted in patients with cancer                 |
| Rackow 1983    | Adults                                            |
| Rahman 1988    | Diarrhoea                                         |
| Schortgen 2000 | Adults                                            |
| Tanaka 1975    | Article in Japanese, not retrieved                |
| Veneman 2004   | Albumin given to treat hypo-albuminaemia          |
| Weis 1983      | Interventions given to test for allergic reaction |

---
